# Supplementary material for: Combined Effects of Prenatal Exposures to Environmental Chemicals on Birth Weight
Source: PubMed Central journal article supplement (PMC4881120; doi:10.3390/ijerph13050495), 2016-05-12

# Supplementary Materials: Combined Effects of Prenatal Exposures to Environmental Chemicals on Birth Weight

Eva Govarts, Sylvie Remy, Liesbeth Bruckers, Elly Den Hond, Isabelle Sioen, Vera Nelen, Willy Baeyens, Tim S Nawrot, Ilse Loots, Nick Van Larebeke and Greet Schoeters

**Table S1.** Pearson correlation matrix of the exposure data.

|                         | PCB 180      | PCB 153      | PCB 138      | p,p'-DDE     | CALUX        | PFOS         | PFOA         | Lead        | Cadmium      | Manganese    | Thallium     | Arsenic      | MECPP        | PM <sub>2.5</sub> | Copper      | Methylmercury |
|-------------------------|--------------|--------------|--------------|--------------|--------------|--------------|--------------|-------------|--------------|--------------|--------------|--------------|--------------|-------------------|-------------|---------------|
| <b>PCB 180</b>          | 1; 1         |              |              |              |              |              |              |             |              |              |              |              |              |                   |             |               |
| <b>PCB 153</b>          | 0.9; <0.001  | 1; 1         |              |              |              |              |              |             |              |              |              |              |              |                   |             |               |
| <b>PCB 138</b>          | 0.77; <0.001 | 0.8; <0.001  | 1; 1         |              |              |              |              |             |              |              |              |              |              |                   |             |               |
| <b>p,p'-DDE</b>         | 0.46; <0.001 | 0.54; <0.001 | 0.48; <0.001 | 1; 1         |              |              |              |             |              |              |              |              |              |                   |             |               |
| <b>CALUX</b>            | 0.21; 0.002  | 0.15; 0.022  | 0.1; 0.152   | 0.09; 0.155  | 1; 1         |              |              |             |              |              |              |              |              |                   |             |               |
| <b>PFOS</b>             | 0.13; 0.053  | 0.22; 0.001  | 0.14; 0.045  | 0.2; 0.004   | 0.02; 0.816  | 1; 1         |              |             |              |              |              |              |              |                   |             |               |
| <b>PFOA</b>             | 0.16; 0.018  | 0.19; 0.005  | 0.06; 0.414  | 0.07; 0.307  | 0.09; 0.205  | 0.5; <0.001  | 1; 1         |             |              |              |              |              |              |                   |             |               |
| <b>Lead</b>             | 0.24; <0.001 | 0.24; <0.001 | 0.17; 0.011  | 0.22; <0.001 | -0.02; 0.777 | 0.1; 0.159   | 0.16; 0.019  | 1; 1        |              |              |              |              |              |                   |             |               |
| <b>Cadmium</b>          | 0.17; 0.01   | 0.11; 0.085  | 0.09; 0.156  | 0.01; 0.901  | 0.1; 0.164   | -0.17; 0.014 | 0.03; 0.718  | 0.14; 0.035 | 1; 1         |              |              |              |              |                   |             |               |
| <b>Manganese</b>        | 0.13; 0.053  | 0.08; 0.203  | 0.15; 0.023  | -0.06; 0.326 | -0.09; 0.172 | -0.2; 0.003  | -0.09; 0.221 | 0.2; 0.002  | -0.03; 0.62  | 1; 1         |              |              |              |                   |             |               |
| <b>Thallium</b>         | -0.11; 0.097 | -0.09; 0.163 | -0.14; 0.036 | -0.03; 0.624 | -0.09; 0.196 | 0.02; 0.795  | 0.07; 0.291  | 0.13; 0.047 | 0.03; 0.659  | 0.14; 0.026  | 1; 1         |              |              |                   |             |               |
| <b>Arsenic</b>          | 0.26; <0.001 | 0.27; <0.001 | 0.17; 0.01   | 0.03; 0.7    | 0.05; 0.503  | 0.09; 0.216  | 0.1; 0.134   | 0.21; 0.001 | -0.05; 0.492 | 0.15; 0.02   | 0.05; 0.446  | 1; 1         |              |                   |             |               |
| <b>MECPP</b>            | -0.03; 0.617 | -0.07; 0.343 | -0.09; 0.209 | 0.01; 0.859  | -0.02; 0.827 | 0.07; 0.315  | 0.11; 0.126  | 0.01; 0.884 | -0.08; 0.238 | -0.07; 0.34  | 0.13; 0.053  | -0.07; 0.328 | 1; 1         |                   |             |               |
| <b>PM<sub>2.5</sub></b> | 0.19; 0.003  | 0.16; 0.017  | 0.21; <0.001 | 0.09; 0.15   | 0.18; 0.008  | 0.07; 0.339  | 0.07; 0.29   | 0.05; 0.48  | 0.17; 0.01   | -0.01; 0.921 | -0.06; 0.394 | -0.05; 0.455 | -0.15; 0.028 | 1; 1              |             |               |
| <b>Copper</b>           | 0.06; 0.339  | 0.02; 0.818  | 0.03; 0.659  | 0.01; 0.821  | -0.1; 0.138  | -0.1; 0.133  | -0.07; 0.351 | 0.15; 0.018 | -0.04; 0.553 | 0.38; <0.001 | 0.29; <0.001 | 0.08; 0.192  | 0.2; 0.004   | -0.11; 0.102      | 1; 1        |               |
| <b>Methyl-mercury</b>   | 0.29; <0.001 | 0.3; <0.001  | 0.15; 0.018  | 0.11; 0.094  | 0.07; 0.319  | 0.35; <0.001 | 0.23; 0.001  | 0.15; 0.019 | -0.09; 0.176 | 0.11; 0.082  | 0.02; 0.786  | 0.46; <0.001 | -0.01; 0.845 | -0.05; 0.46       | 0.06; 0.369 | 1; 1          |

Note: Pearson correlation coefficient followed by corresponding p-value.

**Table S2.** Results of the Principal Component Analysis (PCA): component loading weights for the exposures.

| Exposure                      | Whole PCA (All 16 Exposures) |              |             |              |              |             | Subset PCA (Subset of 12 Exposures) |             |              |             |
|-------------------------------|------------------------------|--------------|-------------|--------------|--------------|-------------|-------------------------------------|-------------|--------------|-------------|
|                               | PC1                          | PC2          | PC3         | PC4          | PC5          | PC6         | PC1                                 | PC2         | PC3          | PC4         |
| <b>Principal Component</b>    | <b>PC1</b>                   | <b>PC2</b>   | <b>PC3</b>  | <b>PC4</b>   | <b>PC5</b>   | <b>PC6</b>  | <b>PC1</b>                          | <b>PC2</b>  | <b>PC3</b>   | <b>PC4</b>  |
| <b>Explained variance (%)</b> | <b>22%</b>                   | <b>11%</b>   | <b>10%</b>  | <b>8%</b>    | <b>8%</b>    | <b>6%</b>   | <b>28%</b>                          | <b>15%</b>  | <b>11%</b>   | <b>9%</b>   |
| PCB 138                       | <b>0.80</b>                  | 0.08         | -0.27       | 0.02         | -0.26        | -0.09       | <b>0.85</b>                         | -0.20       | 0.07         | -0.17       |
| PCB 153                       | <b>0.92</b>                  | 0.04         | -0.19       | 0.03         | -0.11        | 0.03        | <b>0.93</b>                         | -0.12       | -0.03        | -0.07       |
| PCB 180                       | <b>0.88</b>                  | 0.08         | -0.17       | 0.05         | -0.05        | 0.13        | <b>0.92</b>                         | -0.09       | 0.01         | -0.03       |
| p,p'-DDE                      | <b>0.56</b>                  | -0.06        | -0.05       | 0.15         | -0.39        | 0.02        | <b>0.62</b>                         | -0.19       | 0.09         | -0.33       |
| CALUX                         | 0.23                         | -0.27        | -0.15       | 0.16         | 0.27         | <b>0.65</b> | /                                   | /           | /            | /           |
| PFOS                          | 0.40                         | <b>-0.57</b> | <b>0.43</b> | -0.11        | -0.08        | -0.28       | /                                   | /           | /            | /           |
| PFOA                          | 0.31                         | <b>-0.42</b> | <b>0.52</b> | 0.16         | 0.21         | -0.14       | /                                   | /           | /            | /           |
| Lead                          | <b>0.41</b>                  | 0.27         | 0.27        | 0.30         | 0.16         | -0.35       | 0.37                                | 0.33        | 0.24         | 0.31        |
| Cadmium                       | 0.10                         | 0.13         | -0.08       | <b>0.64</b>  | <b>0.54</b>  | 0.12        | 0.15                                | -0.19       | <b>0.50</b>  | <b>0.63</b> |
| Manganese                     | 0.13                         | <b>0.70</b>  | -0.07       | -0.07        | -0.01        | -0.20       | 0.19                                | <b>0.57</b> | 0.29         | -0.12       |
| Thallium                      | -0.07                        | 0.34         | <b>0.57</b> | 0.29         | 0.02         | 0.01        | -0.09                               | <b>0.51</b> | <b>0.41</b>  | 0.01        |
| Arsenic                       | <b>0.47</b>                  | 0.25         | 0.13        | -0.36        | <b>0.48</b>  | 0.06        | 0.37                                | <b>0.46</b> | <b>-0.45</b> | <b>0.43</b> |
| Copper                        | 0.05                         | <b>0.57</b>  | 0.36        | 0.15         | -0.25        | 0.20        | 0.10                                | <b>0.64</b> | 0.38         | -0.31       |
| MECPP                         | 0.01                         | -0.12        | <b>0.49</b> | 0.17         | <b>-0.45</b> | <b>0.41</b> | /                                   | /           | /            | /           |
| PM <sub>2.5</sub>             | 0.10                         | -0.35        | -0.25       | <b>0.47</b>  | 0.05         | -0.27       | 0.20                                | -0.38       | 0.37         | 0.27        |
| Methylmercury                 | <b>0.50</b>                  | -0.03        | 0.31        | <b>-0.52</b> | 0.29         | 0.11        | <b>0.40</b>                         | <b>0.40</b> | <b>-0.56</b> | 0.19        |

Abbreviations: PC: Principal Component.

**Table S3.** Mixture regression models with significant negative associations between maternal exposure and birth weight.

| N Exposures | p-Value | Estimate<br>(95% CI) *       | R <sup>2</sup> Adj. | MSE     | N   | sum(PCB) * | P,p'-DDE | CALUX | PFOS | PFOA | Lead | Cadmium | Manganese | Thallium | Arsenic | MECPP | PM <sub>2.5</sub> | Copper | Methylmercury |
|-------------|---------|------------------------------|---------------------|---------|-----|------------|----------|-------|------|------|------|---------|-----------|----------|---------|-------|-------------------|--------|---------------|
| 1           | 0.0156  | -90.59<br>(-163.83; -17.35)  | 0.35                | 148,758 | 228 |            |          |       |      |      |      |         |           |          |         |       |                   |        |               |
| 2           | 0.0045  | -95.92<br>(-161.77; -30.08)  | 0.37                | 145,897 | 217 |            |          |       |      |      |      | ■       |           |          |         |       |                   |        |               |
| 2           | 0.0083  | -108.69<br>(-189.04; -28.33) | 0.34                | 138,750 | 201 |            |          |       |      |      |      | ■       |           |          |         |       |                   |        |               |
| 3           | 0.0030  | -120.97<br>(-200.37; -41.57) | 0.36                | 135,197 | 190 |            |          |       |      |      |      | ■       |           |          |         |       |                   |        |               |
| 3           | 0.0054  | -108.84<br>(-185.19; -32.49) | 0.35                | 138,201 | 201 |            |          |       |      |      |      | ■       |           | ■        |         |       |                   |        |               |
| 4           | 0.0025  | -130.32<br>(-214.13; -46.51) | 0.38                | 127,503 | 162 |            |          |       |      | ■    |      | ■       |           | ■        |         |       |                   |        |               |
| 4           | 0.0036  | -115.78<br>(-193.16; -38.4)  | 0.36                | 135,427 | 190 |            |          |       |      | ■    |      | ■       |           | ■        |         |       |                   |        |               |
| 5           | 0.0019  | -135.14<br>(-219.7; -50.59)  | 0.38                | 127,083 | 162 |            |          |       |      | ■    |      | ■       |           | ■        |         |       |                   |        |               |
| 5           | 0.0021  | -129.75<br>(-211.89; -47.61) | 0.36                | 134,989 | 189 |            |          |       |      | ■    |      | ■       |           | ■        |         |       |                   |        | ■             |

Notes: \* The estimate is calculated for an increase of the mixture Z-score with the interquartile range. The model is adjusted for gestational age, child's sex, smoking of the mother during pregnancy, parity and maternal prepregnancy BMI. The black rectangles indicate the exposure biomarkers that are included in the model. MSE: Mean squared error. \* 3 marker PCB's (i.e., PCB 180, PCB 153, and PCB 138) were summed prior to analysis.



Table S4. Cont.

| N Chemicals | p <sub>Interaction</sub> | p <sub>Girls</sub> | Estimate (95% CI) <sub>Girls</sub> * | p <sub>Boys</sub> | Estimate (95% CI) <sub>Boys</sub> * | R <sup>2</sup> Adj. | MSE     | N Samples | Sum(PCB) * | p,p'-DDE | CALUX | PFOS | PFOA | Lead | Cadmium | Manganese | Thallium | Arsenic | MECPP | PM <sub>2.5</sub> | Copper | Methylmercury |  |
|-------------|--------------------------|--------------------|--------------------------------------|-------------------|-------------------------------------|---------------------|---------|-----------|------------|----------|-------|------|------|------|---------|-----------|----------|---------|-------|-------------------|--------|---------------|--|
| 6           | 0.0032                   | 0.0006             | -235.45<br>(-368.62; -102.29)        | 0.6698            | 24<br>(-86.89; 134.88)              | 0.36                | 141,171 | 183       |            |          |       |      |      |      |         |           |          |         |       |                   |        |               |  |
| 6           | 0.0140                   | 0.0007             | -217.71<br>(-342.6; -92.83)          | 0.8211            | -12.43<br>(-120.77; 95.91)          | 0.36                | 141,619 | 183       |            |          |       |      |      |      |         |           |          |         |       |                   |        |               |  |

Notes: \* The estimate is calculated for an increase of the mixture Z-score with the interquartile range. The model is adjusted for gestational age, smoking of the mother during pregnancy, parity and maternal prepregnancy BMI. The black rectangles indicate the exposure biomarkers that are included in the model. MSE: Mean squared error. \* 3 marker PCB's (i.e., PCB 180, PCB 153, and PCB 138) were summed prior to analysis.

Table S5. Mixture regression models with significant negative associations between maternal exposure and birth weight in boys but not in girls.

| N Chemicals | p <sub>Interaction</sub> | p <sub>Girls</sub> | Estimate (95% CI) <sub>Girls</sub> * | p <sub>Boys</sub> | Estimate (95% CI) <sub>Boys</sub> * | R <sup>2</sup> Adj. | MSE    | N Samples | sum(PCB) * | p,p'-DDE | CALUX | PFOS | PFOA | Lead | Cadmium | Manganese | Thallium | Arsenic | MECPP | PM <sub>2.5</sub> | Copper | Methylmercury |  |
|-------------|--------------------------|--------------------|--------------------------------------|-------------------|-------------------------------------|---------------------|--------|-----------|------------|----------|-------|------|------|------|---------|-----------|----------|---------|-------|-------------------|--------|---------------|--|
| 1           | 0.0458                   | 0.3186             | 61.47<br>(-59.77; 82.71)             | 0.0646            | -101.22<br>(-208.64; 6.19)          | 0.34                | 141126 | 207       |            |          |       |      |      |      |         |           |          |         |       |                   |        |               |  |
| 2           | 0.0145                   | 0.4902             | 34.82<br>(-64.55; 134.2)             | 0.0061            | -128.65<br>(-220.05; -37.25)        | 0.37                | 136225 | 196       |            |          |       |      |      |      |         |           |          |         |       |                   |        |               |  |

Notes: \* The estimate is calculated for an increase of the mixture Z-score with the interquartile range. The model is adjusted for gestational age, smoking of the mother during pregnancy, parity, and maternal prepregnancy BMI. The black rectangles indicate the exposure biomarkers that are included in the model. MSE: Mean squared error. \* 3 marker PCB's (i.e., PCB 180, PCB 153, and PCB 138) were summed prior to analysis.

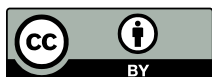

Supplement: ijerph-13-00495-s001.pdf [file ijerph-13-00495-s001.pdf]
